# Supplementary material for: A retrospective analysis of postoperative hypokalemia in pituitary adenomas after transsphenoidal surgery
Source: PeerJ. 2017 May 23;5:e3337. doi: 10.7717/peerj.3337 (PMC5444367; doi:10.7717/peerj.3337)
Supplement: Data S1 [file peerj-05-3337-s002.xlsx]

## Sheet: Sheet1
sex	age	age group	geography	Length of stay	group of stay	Histopathology	Hypokalemia	hypertension	diabetes	Tumor size
1	49	2	2	9	1	FSH	0	1	0	1
1	56	2	2	8	1	NO	0	0	0	2
1	44	1	1	15	2	PRL	0	0	0	2
1	58	2	2	17	2	PRL	0	1	0	2
1	45	1	1	28	2	NO	0	0	0	2
1	57	2	1	7	1	NO	0	0	0	2
1	47	2	2	10	1	NO	0	0	0	2
1	57	2	1	9	1	NO	0	0	1	2
1	37	1	1	12	1	PRL	0	0	0	2
1	47	2	1	14	2	FSH	0	0	0	2
1	71	2	2	15	2	PRL	0	0	0	2
1	66	2	1	12	1	NO	0	0	0	2
1	17	1	2	10	1	PRL	0	0	0	2
1	35	1	1	12	1	NO	0	0	0	2
1	49	2	1	7	1	NO	0	0	0	2
1	69	2	1	7	1	NO	1	0	0	2
1	53	2	2	12	1	PRL	0	0	0	2
1	57	2	1	10	1	MIX	0	0	0	2
1	57	2	2	14	2	PRL	0	0	0	2
1	55	2	1	9	1	PRL	0	0	0	2
1	30	1	2	7	1	GH	0	0	0	1
1	60	2	1	10	1	MIX	0	0	0	2
1	56	2	1	11	1	PRL	1	1	0	1
1	63	2	1	12	1	PRL	0	0	0	2
1	46	2	1	12	1	NO	0	1	0	2
1	63	2	2	14	2	NO	0	0	0	2
1	28	1	2	14	2	GH	0	0	0	2
1	43	1	1	12	1	FSH	0	1	0	2
1	47	2	2	14	2	GH	0	0	1	2
1	56	2	2	14	2	GH	0	0	1	2
1	48	2	2	10	1	GH	0	1	0	2
1	50	2	2	9	1	NO	0	1	0	2
1	31	1	1	12	1	NO	0	0	1	2
1	49	2	1	19	2	GH	0	1	0	2
1	43	1	1	21	2	NO	0	0	0	2
1	43	1	2	13	2	FSH	0	0	0	2
1	20	1	2	15	2	PRL	0	0	0	2
1	63	2	1	9	1	GH	0	0	0	2
1	55	2	1	10	1	NO	0	1	0	2
1	81	2	2	12	1	NO	0	0	0	2
1	62	2	2	14	2	NO	0	1	0	2
1	41	1	1	10	1	GH	0	0	0	2
1	30	1	1	12	1	PRL	0	0	0	2
1	37	1	2	8	1	FSH	0	0	0	2
1	52	2	1	9	1	NO	0	0	0	2
1	60	2	2	9	1	TSH	0	0	1	1
1	56	2	1	8	1	NO	0	0	0	2
1	23	1	1	10	1	GH	0	1	0	2
1	52	2	1	7	1	NO	0	0	0	2
1	23	1	1	8	1	NO	0	0	0	2
1	62	2	1	11	1	FSH	0	0	0	1
1	59	2	2	9	1	NO	0	0	0	2
1	21	1	2	21	2	NO	0	0	0	2
1	44	1	1	18	2	GH	1	0	0	2
1	35	1	1	15	2	NO	0	0	0	2
1	38	1	2	15	2	GH	0	0	0	2
1	57	2	2	12	1	GH	0	0	0	2
1	54	2	1	9	1	NO	0	0	0	2
1	42	1	2	8	1	NO	0	0	0	2
1	50	2	1	13	2	PRL	0	0	0	2
1	58	2	2	10	1	NO	0	0	0	2
1	62	2	1	8	1	NO	0	0	0	1
1	62	2	2	8	1	NO	0	0	0	1
1	27	1	1	15	2	ACTH	1	1	1	2
1	43	1	1	19	2	ACTH	0	1	0	2
1	36	1	1	29	2	ACTH	0	1	0	1
1	34	1	1	11	1	ACTH	1	1	0	2
1	60	2	2	20	2	ACTH	0	0	0	2
1	37	1	2	16	2	NO	0	0	0	2
1	46	2	1	12	1	NO	0	0	0	2
1	21	1	2	20	2	GH	0	0	0	1
1	46	2	2	10	1	NO	0	0	0	2
1	48	2	2	11	1	FSH	0	0	0	2
1	55	2	1	8	1	ACTH	0	0	0	2
1	53	2	1	16	2	ACTH	1	1	0	2
1	61	2	2	13	2	ACTH	1	0	0	2
2	43	1	2	27	2	MIX	0	0	0	2
2	57	2	1	13	2	NO	0	0	0	2
2	43	1	1	10	1	PRL	0	1	1	2
2	47	2	1	8	1	PRL	0	0	0	2
2	58	2	2	13	2	NO	0	0	0	2
2	41	1	2	9	1	GH	0	0	0	2
2	44	1	1	17	2	NO	0	0	0	2
2	39	1	1	10	1	GH	0	0	0	2
2	14	1	1	9	1	NO	0	0	0	2
2	67	2	1	12	1	PRL	0	0	0	2
2	55	2	2	10	1	GH	0	0	1	1
2	33	1	1	8	1	PRL	0	0	0	1
2	39	1	2	15	2	PRL	0	0	0	1
2	25	1	1	15	2	PRL	0	0	0	2
2	68	2	2	9	1	NO	0	1	1	2
2	53	2	2	10	1	GH	0	0	0	2
2	41	1	1	9	1	GH	1	0	0	2
2	59	2	2	11	1	TSH	0	1	0	2
2	32	1	1	9	1	PRL	0	0	0	1
2	40	1	2	11	1	PRL	0	0	0	1
2	38	1	1	17	2	PRL	0	0	0	2
2	26	1	2	8	1	PRL	0	0	0	1
2	34	1	2	10	1	PRL	0	0	0	1
2	42	1	2	28	2	PRL	0	0	0	2
2	58	2	1	13	2	NO	0	0	1	2
2	23	1	1	13	2	PRL	0	0	0	1
2	54	2	2	8	1	NO	0	0	0	1
2	39	1	2	10	1	PRL	0	0	0	2
2	45	1	1	6	1	NO	0	0	0	2
2	44	1	2	6	1	PRL	1	0	0	2
2	52	2	1	14	2	NO	0	1	0	2
2	57	2	1	10	1	NO	0	0	0	2
2	61	2	1	9	1	NO	0	0	0	2
2	51	2	1	9	1	NO	0	0	0	2
2	52	2	1	9	1	NO	0	0	0	2
2	30	1	1	13	2	NO	0	0	0	2
2	67	2	2	8	1	NO	0	1	0	2
2	52	2	1	11	1	GH	0	1	1	2
2	50	2	2	14	2	GH	0	0	1	2
2	20	1	1	8	1	MIX	0	1	0	2
2	60	2	2	12	1	NO	0	0	0	2
2	38	1	2	9	1	PRL	0	0	0	2
2	59	2	2	16	2	GH	0	1	1	2
2	27	1	1	11	1	PRL	0	0	0	1
2	52	2	2	12	1	GH	0	0	0	2
2	28	1	1	8	1	PRL	0	0	0	2
2	58	2	1	13	2	NO	1	1	0	2
2	48	2	1	11	1	NO	0	0	0	2
2	27	1	2	12	1	PRL	0	0	0	1
2	48	2	2	10	1	TSH	0	0	0	2
2	35	1	2	8	1	GH	0	0	0	2
2	56	2	2	9	1	GH	0	0	0	2
2	38	1	1	12	1	NO	0	0	0	1
2	18	1	1	12	1	PRL	0	0	0	2
2	48	2	1	12	1	NO	0	0	0	1
2	50	2	2	11	1	PRL	1	0	0	2
2	44	1	1	11	1	NO	0	0	0	2
2	51	2	2	6	1	GH	0	1	0	2
2	21	1	1	12	1	MIX	0	0	0	2
2	42	1	1	16	2	GH	0	0	1	2
2	40	1	2	10	1	PRL	0	0	0	2
2	58	2	1	15	2	TSH	1	0	1	2
2	38	1	1	17	2	PRL	0	0	0	1
2	35	1	2	8	1	PRL	0	0	0	2
2	51	2	2	7	1	GH	0	0	0	2
2	54	2	2	11	1	FSH	0	0	0	2
2	31	1	2	9	1	PRL	0	0	0	1
2	45	1	2	14	2	NO	0	0	0	2
2	59	2	1	10	1	NO	0	1	0	2
2	60	2	1	13	2	NO	0	0	1	2
2	58	2	2	7	1	NO	0	0	0	2
2	37	1	1	12	1	PRL	0	0	0	2
2	40	1	1	9	1	PRL	0	0	0	2
2	64	2	2	14	2	FSH	0	0	0	2
2	46	2	1	10	1	NO	0	0	0	2
2	56	2	2	10	1	NO	0	0	0	2
2	29	1	1	10	1	PRL	0	0	0	2
2	60	2	1	15	2	NO	0	0	0	2
2	26	1	1	7	1	GH	0	0	0	2
2	52	2	1	8	1	PRL	0	0	0	2
2	34	1	1	9	1	ACTH	0	1	0	1
2	53	2	1	21	2	ACTH	1	1	1	1
2	40	1	1	8	1	PRL	0	0	0	1
2	55	2	2	11	1	ACTH	0	1	0	2
2	30	1	1	21	2	ACTH	1	1	0	2
2	67	2	1	13	2	MIX	1	1	1	2
2	49	2	1	10	1	ACTH	0	1	0	2
2	62	2	1	13	2	ACTH	0	0	1	2
2	36	1	2	50	2	PRL	0	0	0	2
2	39	1	2	18	2	PRL	0	0	0	2
2	60	2	2	13	2	NO	0	0	0	2
2	29	1	2	23	2	PRL	0	0	0	1
2	36	1	2	18	2	PRL	0	0	0	2
2	23	1	2	13	2	PRL	0	1	0	1
2	54	2	2	8	1	NO	0	0	0	2
2	47	2	2	13	2	NO	0	0	0	2
2	56	2	2	19	2	NO	0	0	0	2
2	44	1	1	12	1	NO	0	0	0	2
2	63	2	1	12	1	NO	0	0	0	2
2	50	2	1	15	2	MIX	0	0	0	2
2	50	2	1	12	1	ACTH	0	0	0	2
2	41	1	2	12	1	PRL	0	0	0	2
2	36	1	1	17	2	MIX	0	0	0	2
2	66	2	1	13	2	TSH	0	0	0	2
2	51	2	1	15	2	ACTH	1	1	0	1
